# Supplementary material for: New Insights into Xenotransplantation for Cartilage Repair: Porcine Multi-Genetically Modified Chondrocytes as a Promising Cell Source
Source: MDPI journal article supplement (doi:10.3390/cells10082152), 2021-08-20
Supplement: s1 [file s1]

## Supplementary Figure S1

### A) Porcine femoral condyles

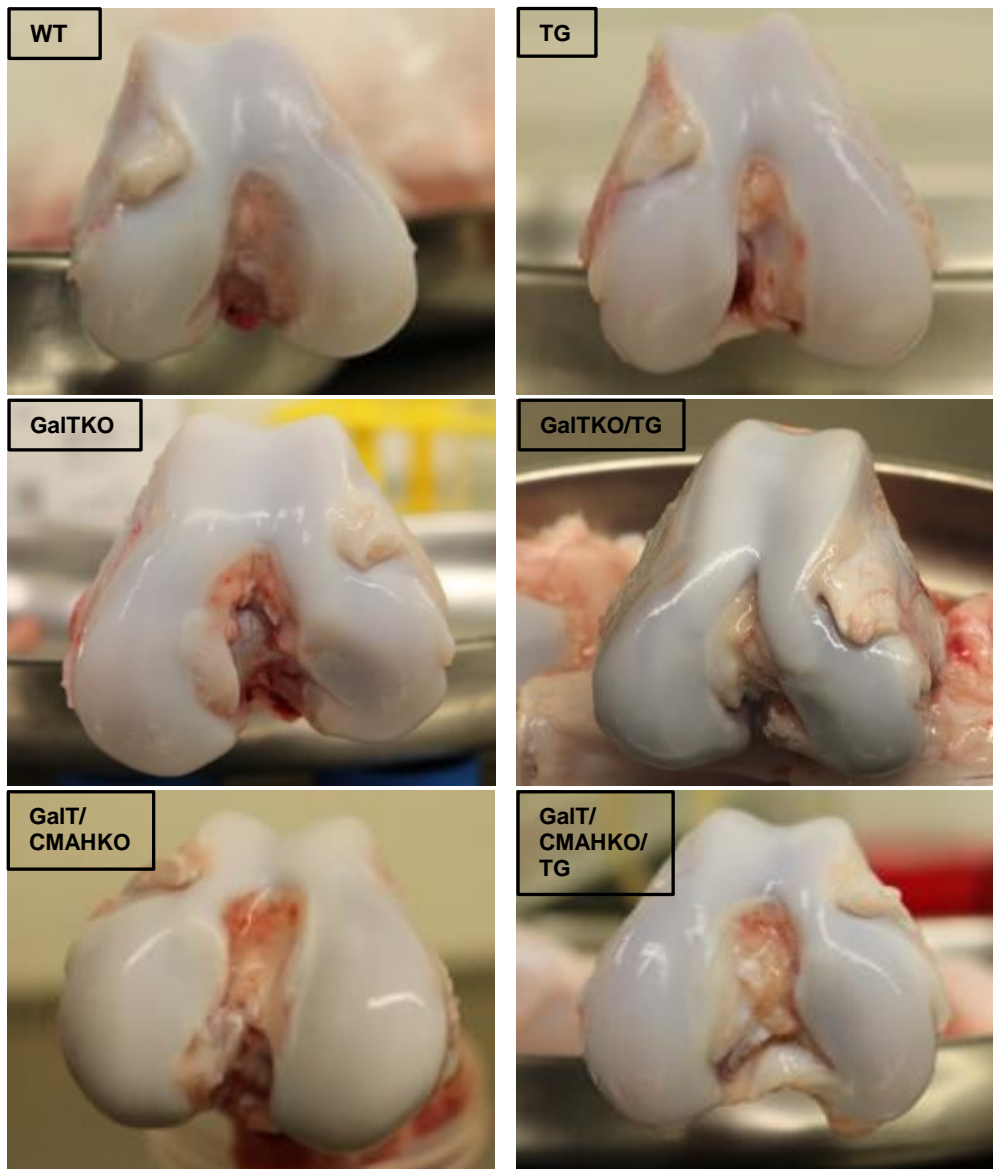

## B) Safranin O staining

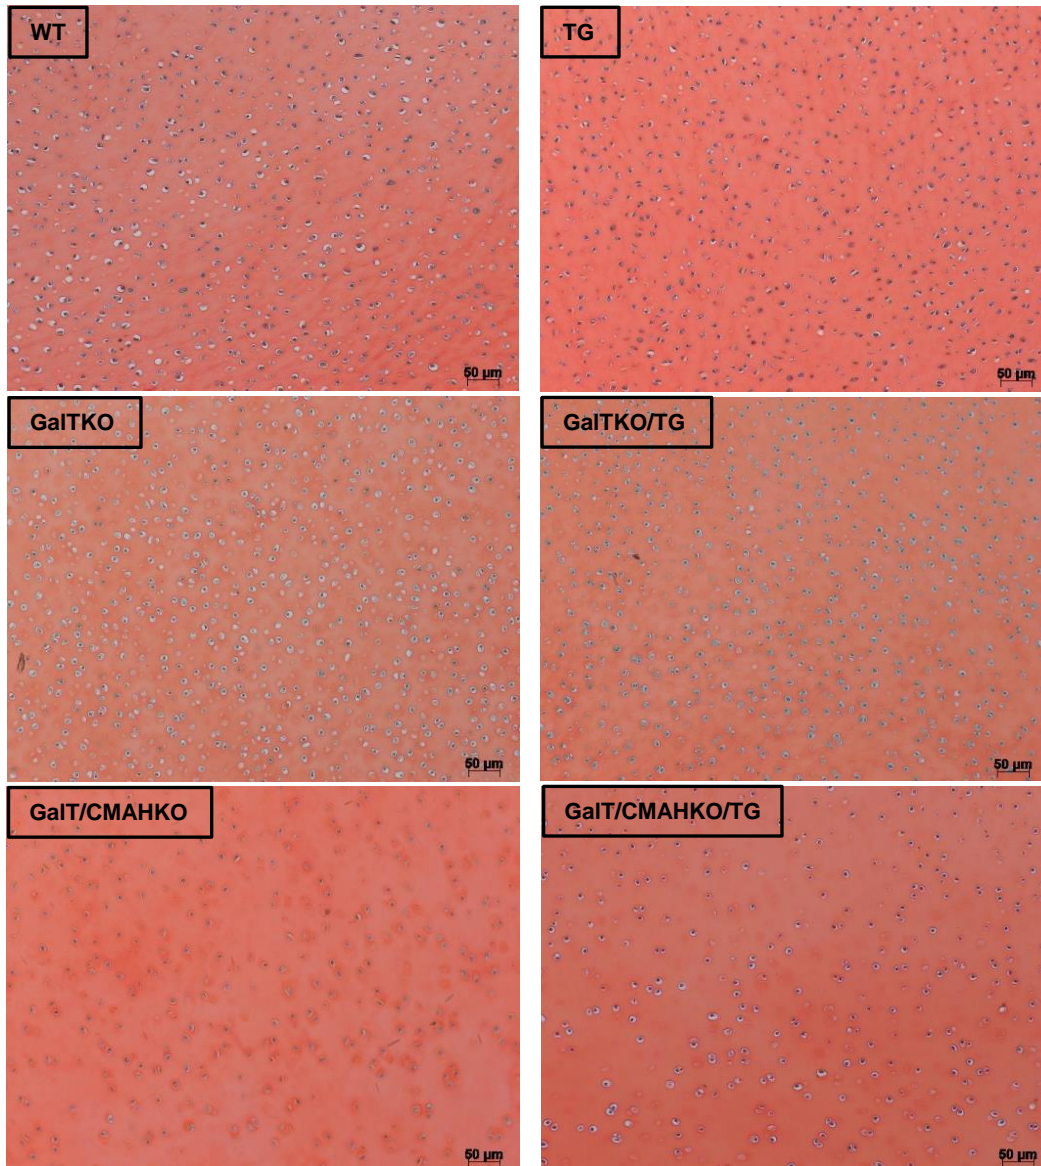



### C) Collagen type II staining

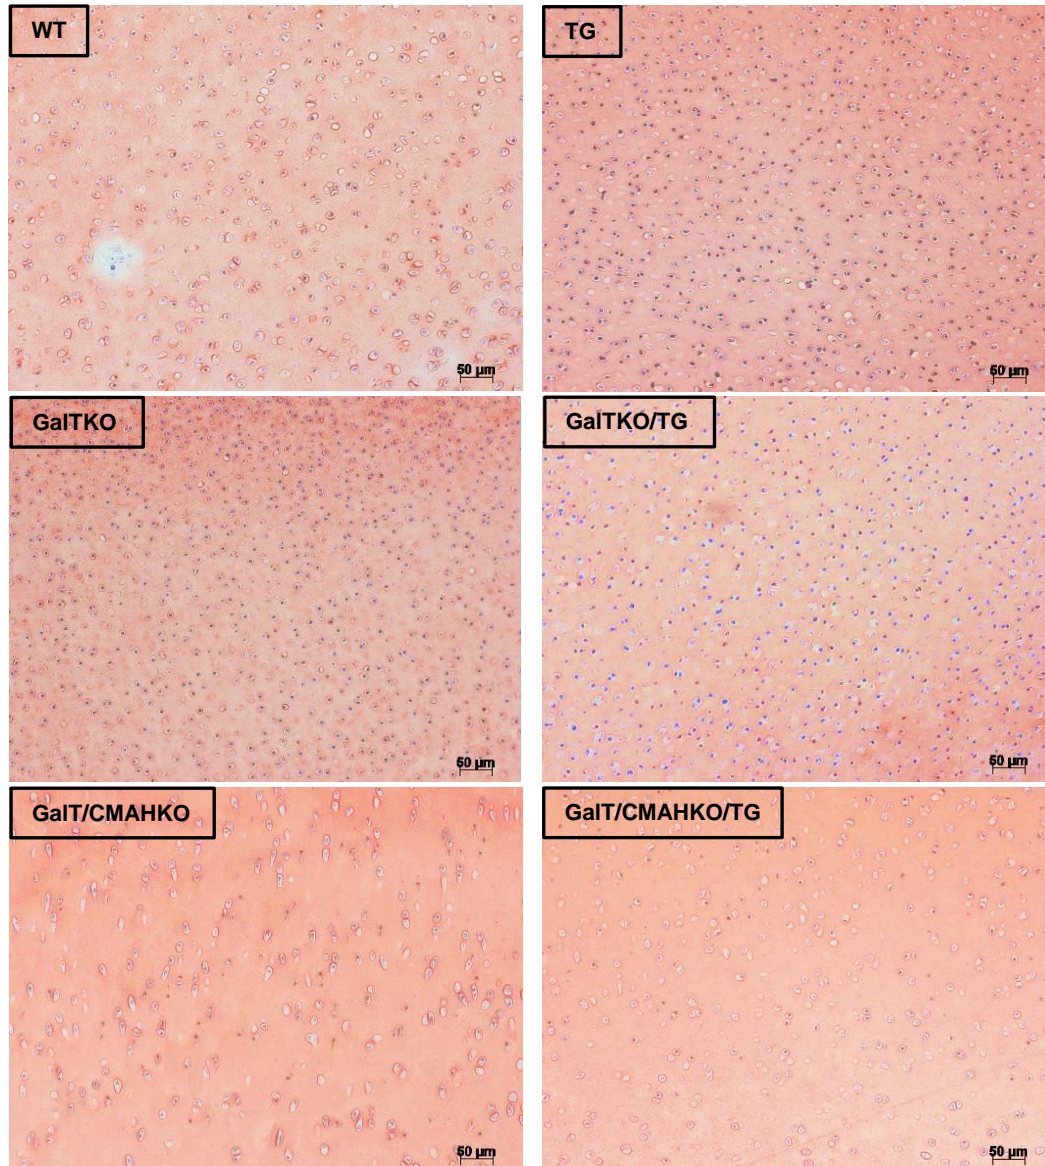

**Supplementary S1 Macroscopic and histomorphologic analysis of distal femoral condyles.** Evaluation of cartilage appearance (A), as well as proteoglycan visualization with Safranin O staining (B; red coloured) and immunohistological staining of collagen type II (C; red colored, counterstaining with Meyer's hemalum).

## Supplementary Figure S2

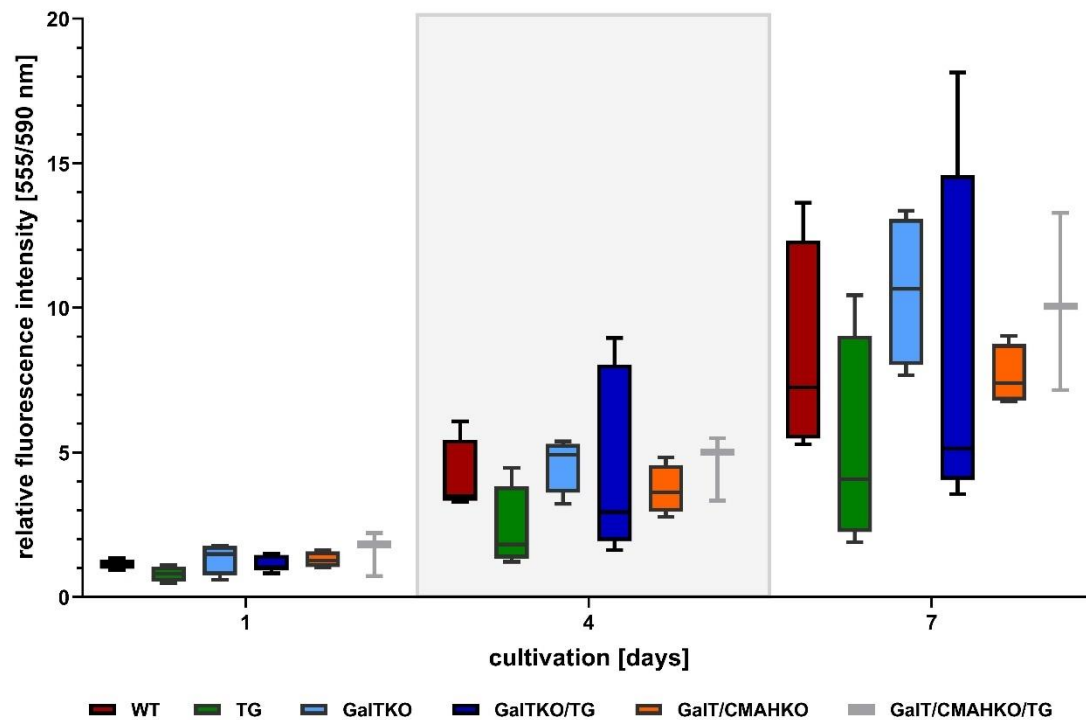

**Supplementary S2 Proliferation of multi-genetically modified chondrocytes.** Cell growth was evaluated within one week cultivation using alamarBlue assay. Proliferation was determined at culture day 1, 4 and 7 and results are given in relation to t0. No statistical differences compared to WT could be detected by two-way ANOVA with Dunnett's multiple comparisons test, n=3-5.

## Supplementary Figure S3

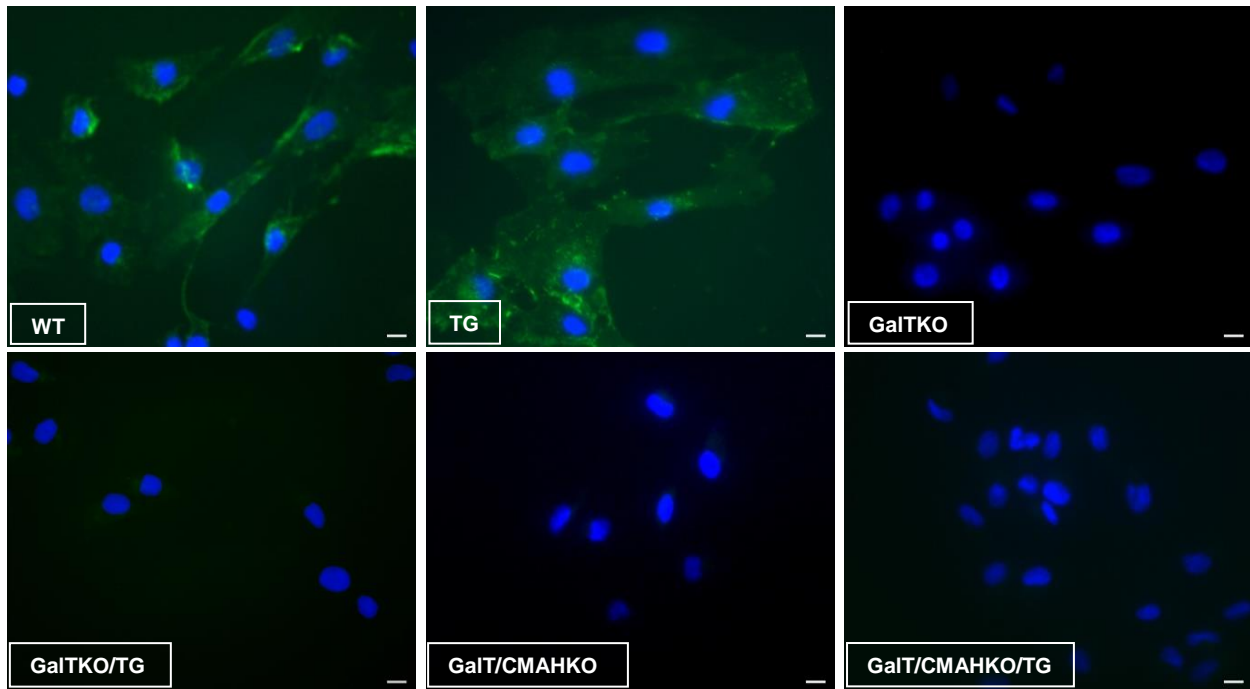

**Supplementary S3 Distribution of  $\alpha$ -1,3-Gal xenoantigen on porcine chondrocytes.** Isolectin B4 FITC conjugated was used to visualize the presence of  $\alpha$ -Gal epitope on the cell surface by fluorescence staining (green). Cell nuclei were counterstained with DAPI (blue). Scale bars in the images represent 10  $\mu$ m.

Supplementary Figure S4

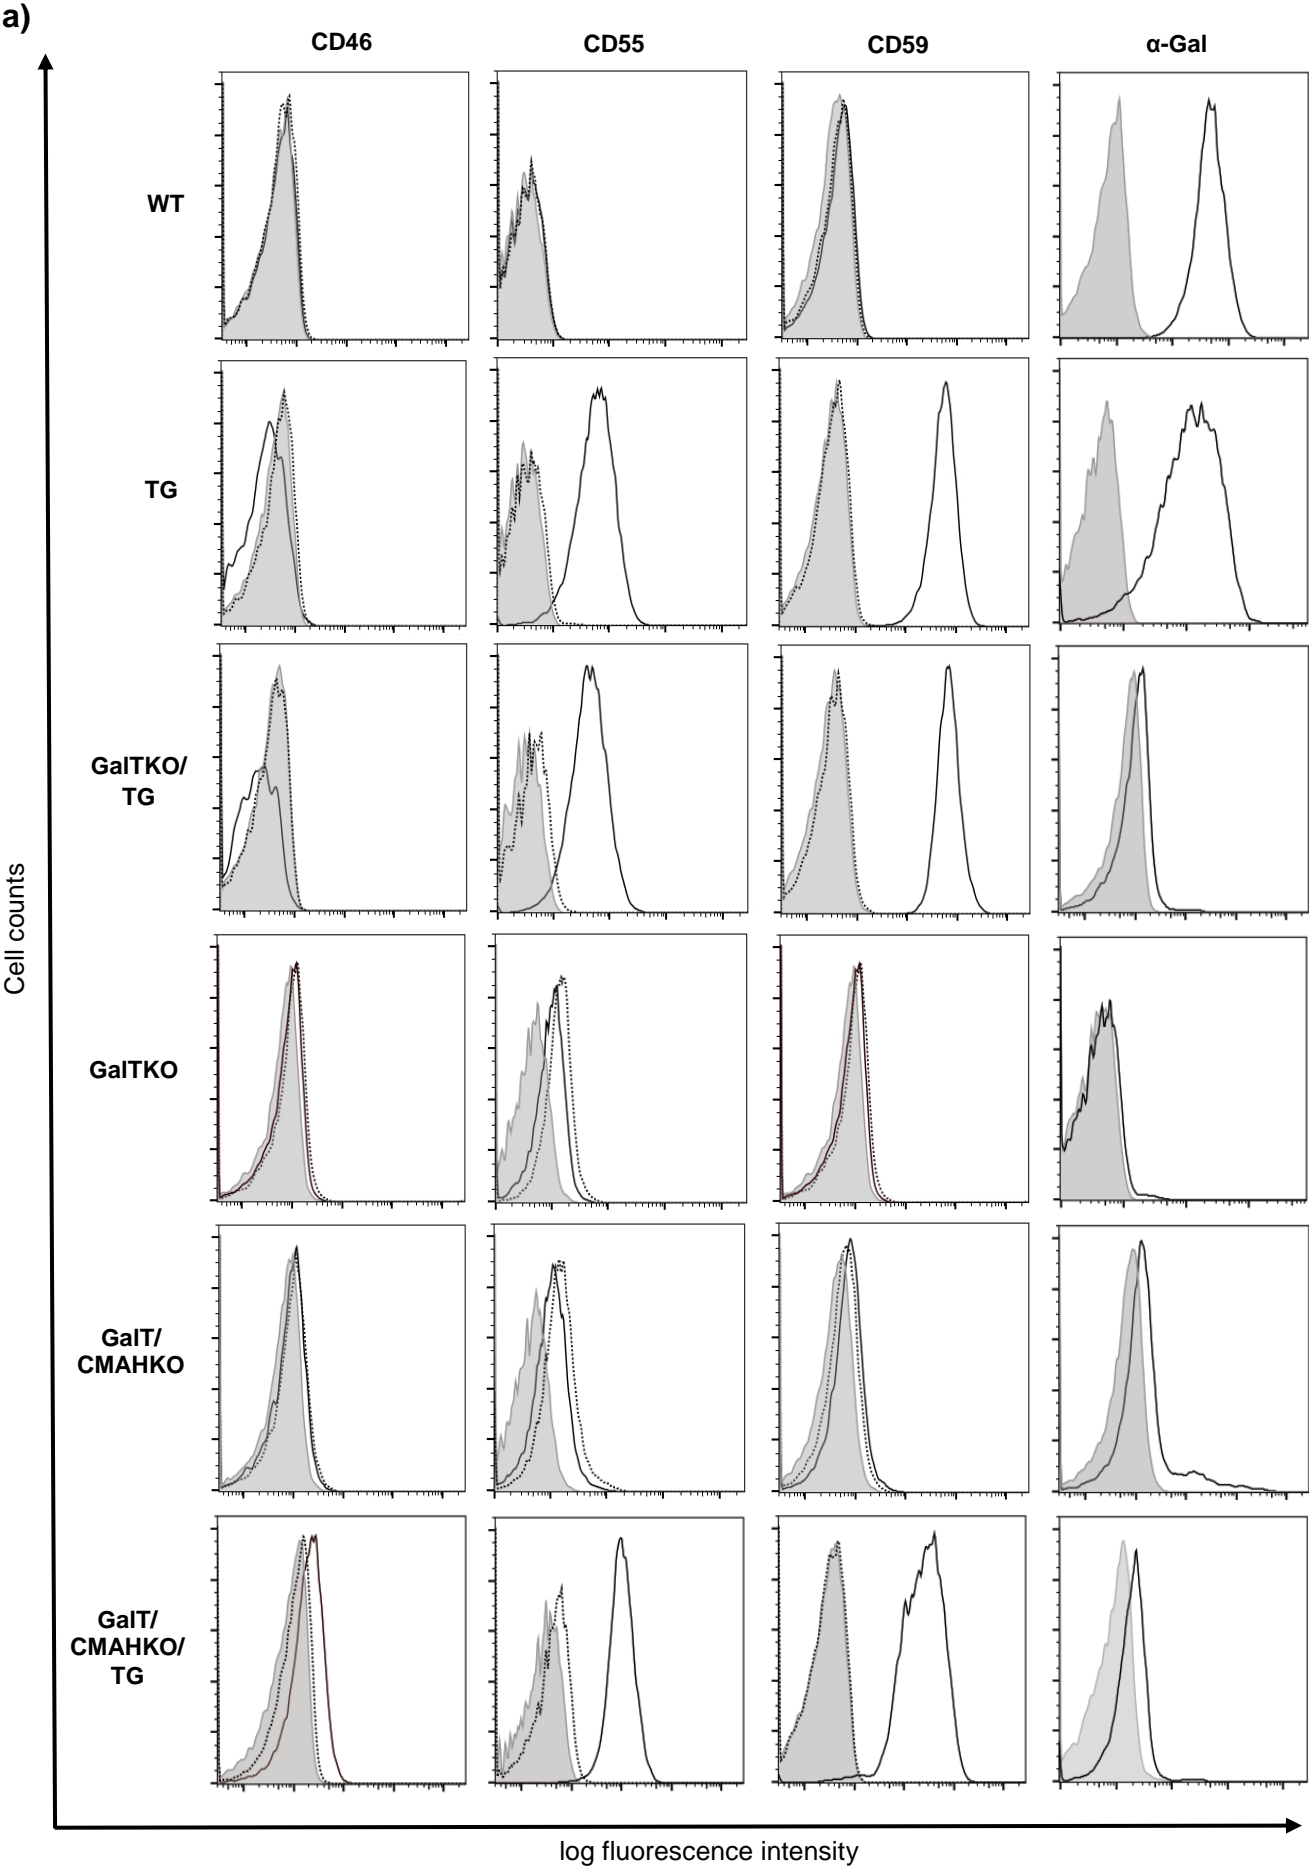

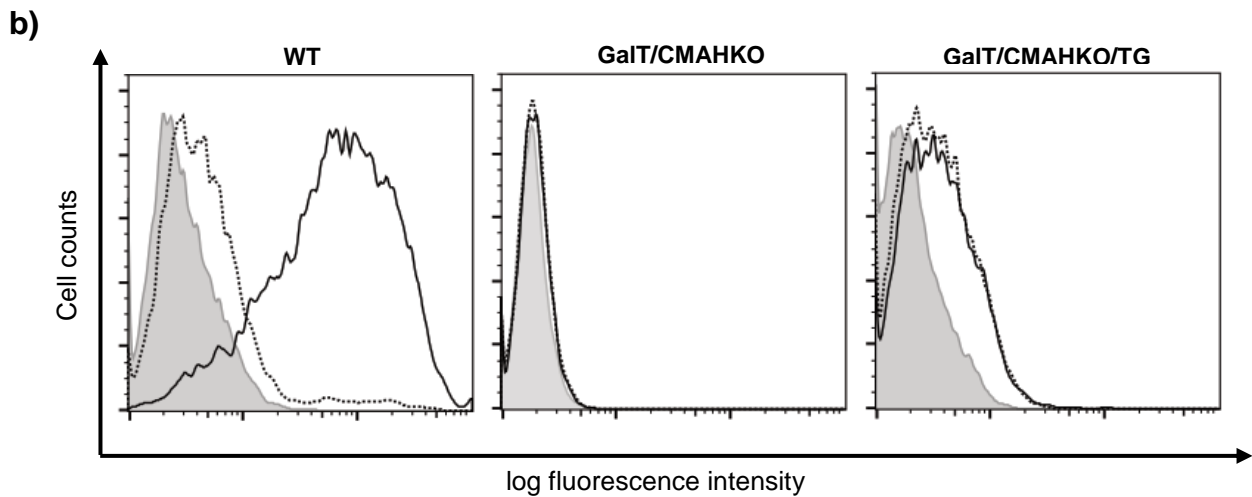

**Supplementary S4 Representative histograms of transgene,  $\alpha$ -1,3-Gal and Neu5Gc flow cytometric analysis.** a) Surface expression of hCregs (CD46, CD55, CD59),  $\alpha$ -1,3-Gal and b) Neu5Gc (solid line, respectively). Grey histograms indicate unstained cells and staining with isotype controls are depicted as dotted histograms. 10.000-15.000 cells were measured.

## Supplementary Figure S5

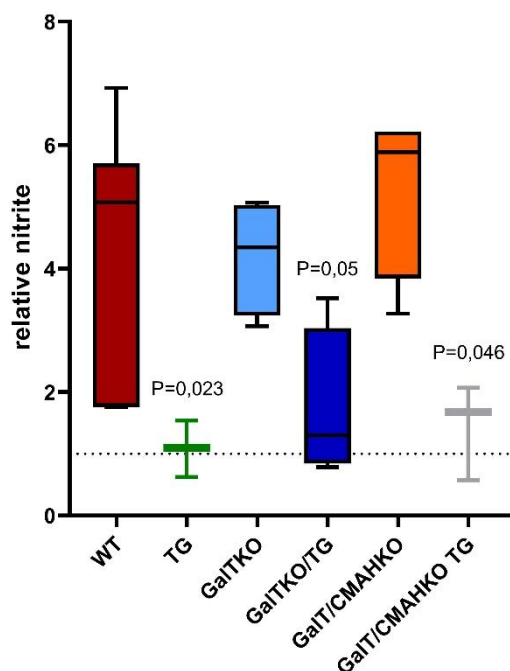

**Supplementary S5 Indirect human TNFAIP3 verification in genetically modified porcine chondrocytes via TNF treatment.** Porcine chondrocytes were stimulated with 5 ng/ml TNF for 24 h and collected supernatants were analyzed for their nitrite content by Griess Assay. Nitrite concentration was normalized to DNA-content and the results are given in relation to unstimulated cells (dotted line). Statistical analysis was done by two-way ANOVA with Dunnett's multiple comparisons test. P-values are shown in case of significant differences compared to WT, n=3-5.

## Supplementary Table S1

**Table S1: Oligonucleotide primers for RT-PCR**

**a) Species: Homo sapiens** (sequences according to Fischer et al. [15])

| Gene    | <u>F</u> orward/<br><u>R</u> everse | Sequence 5`-3`                | Amplicon size<br>(bp) |
|---------|-------------------------------------|-------------------------------|-----------------------|
| CD46    | F                                   | CAA GCA GTC CCT GCA AAT GG    | 335                   |
|         | R                                   | GCA GCA CGA CTC CAC ACT GA    |                       |
| CD55    | F                                   | TTG TCC AGC ACC ACA AA        | 315                   |
|         | R                                   | CGT GTT GCT TGA GCA TTT GG    |                       |
| CD59    | F                                   | GGA GTT GAG ACC TAC TTC ACA G | 208                   |
|         | R                                   | CTT TGG TAA TGA GAC ACG CAT   |                       |
| HMOX1   | F                                   | GAT GGA GCG TCC GCA ACC       | 349                   |
|         | R                                   | CTT CAC ATA GCG CTG CAT GGC   |                       |
| TNFAIP3 | F                                   | TGG GAC TCC AGA AAA CAA GG    | 231                   |
|         | R                                   | GTC CTT TTG GCC TCA TGA AA    |                       |

**b) Species: Sus scrofa** (sequences according to Sommaggio et al. [50])

| Gene   | <u>F</u> orward/<br><u>R</u> everse | Sequence 5`-3`                | Amplicon size<br>(bp) |
|--------|-------------------------------------|-------------------------------|-----------------------|
| ACAN   | F                                   | CCC ACT AGT GCA GCA ACA GA    | 191                   |
|        | R                                   | AGG GTA GAT GGC TGC TCT GA    |                       |
| COL2A1 | F                                   | CAG GGG TGA ACG AGG TTT C     | 190                   |
|        | R                                   | AAT ACC AGC AGC TCC CCT CT    |                       |
| GAPDH  | F                                   | GGC GTG AAC CAT GAG AAG TAT G | 60                    |
|        | R                                   | GGT GCA GGA GGC ATT GCT       |                       |



## Supplementary Figure S6

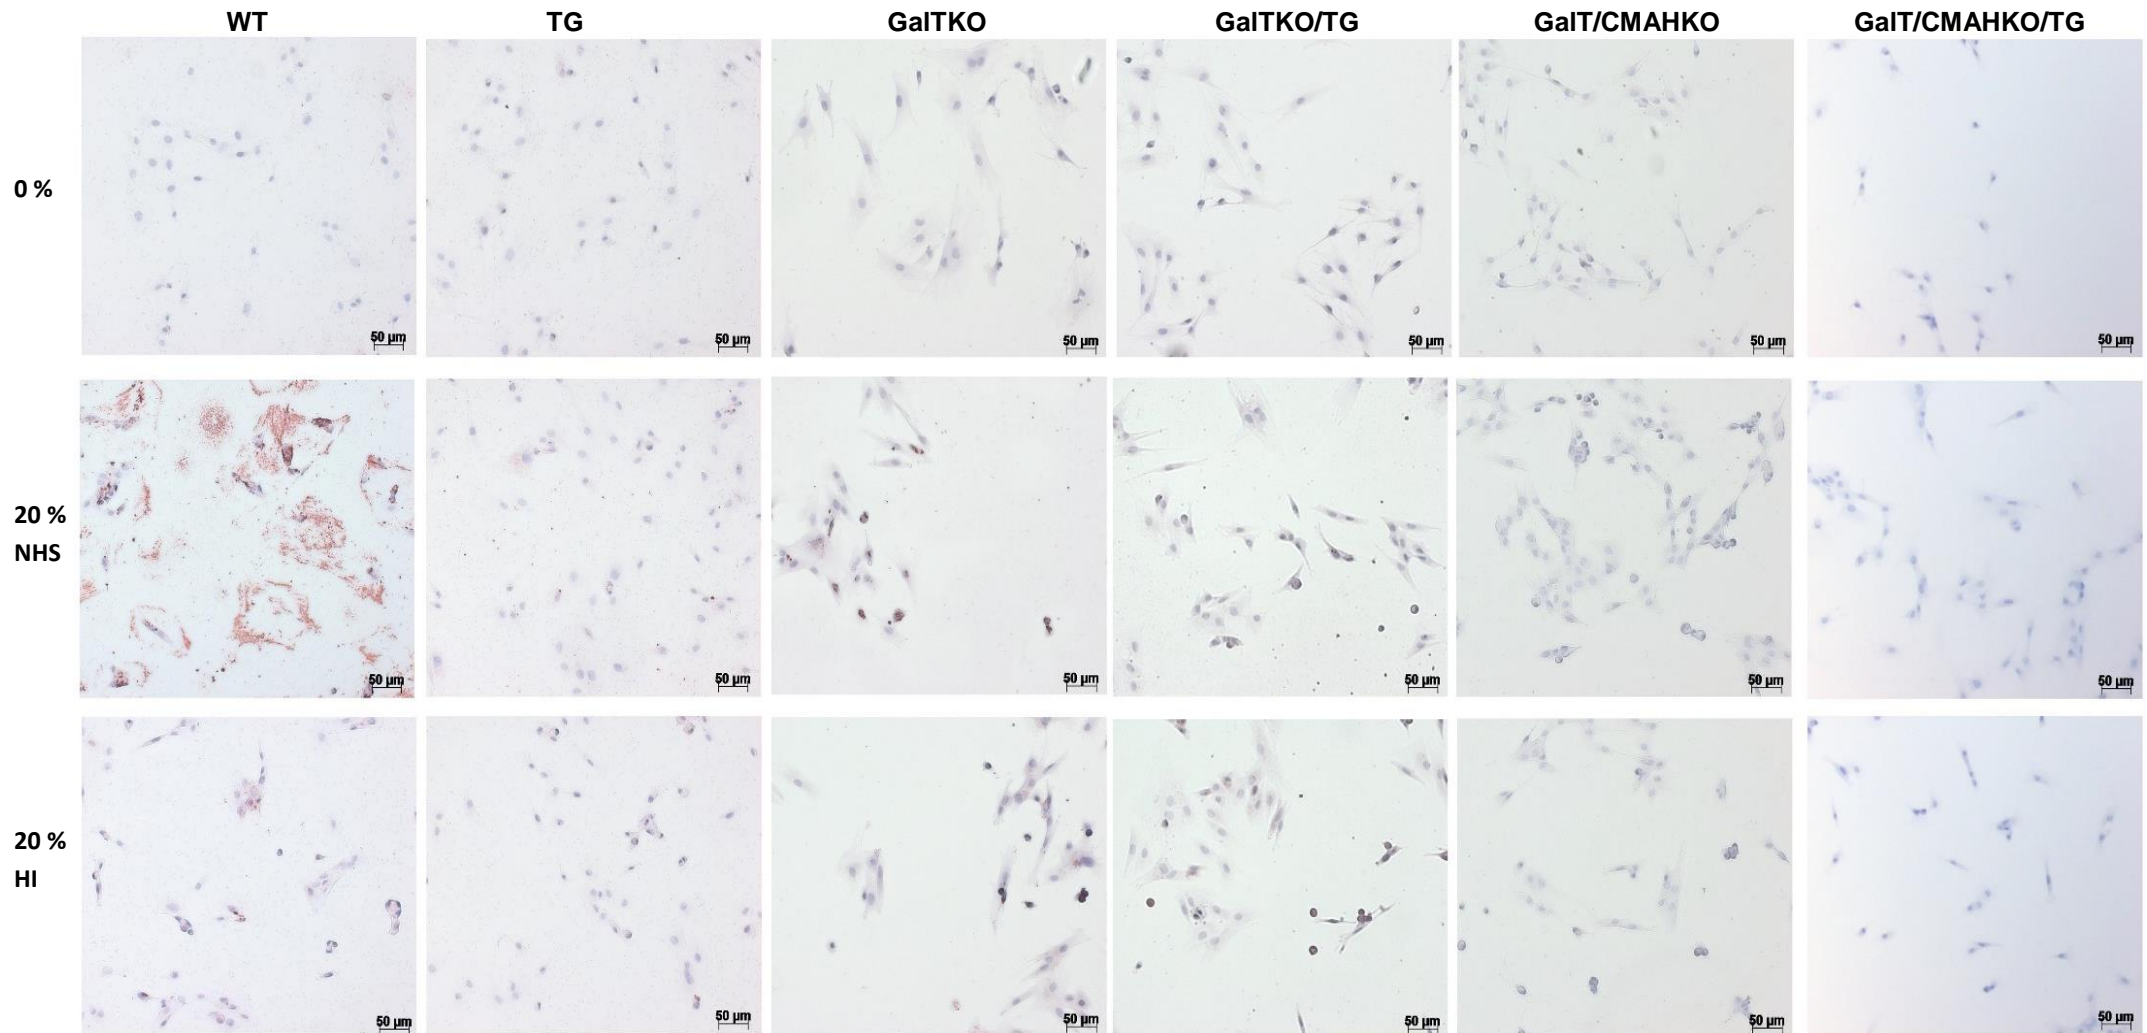

**Supplementary S6 C5b-9 deposition on porcine chondrocytes after NHS treatment.** Porcine Chondrocytes of all variants were exposed to 20 % NHS w/o heat-inactivation for 1 h. Afterwards immune-cytological staining of membrane-bound C5b-9 was performed (red colored). Meyer's hemalum was used for counterstaining. Abbreviations: NHS=normal human serum, HI=heat-inactivated NHS.
